# Supplementary material
Source: PubMed Central journal article supplement (PMC6053660)
Supplement: develop-145-152306-s1.pdf [file develop-145-152306-s1.pdf]

## Supplemental Material

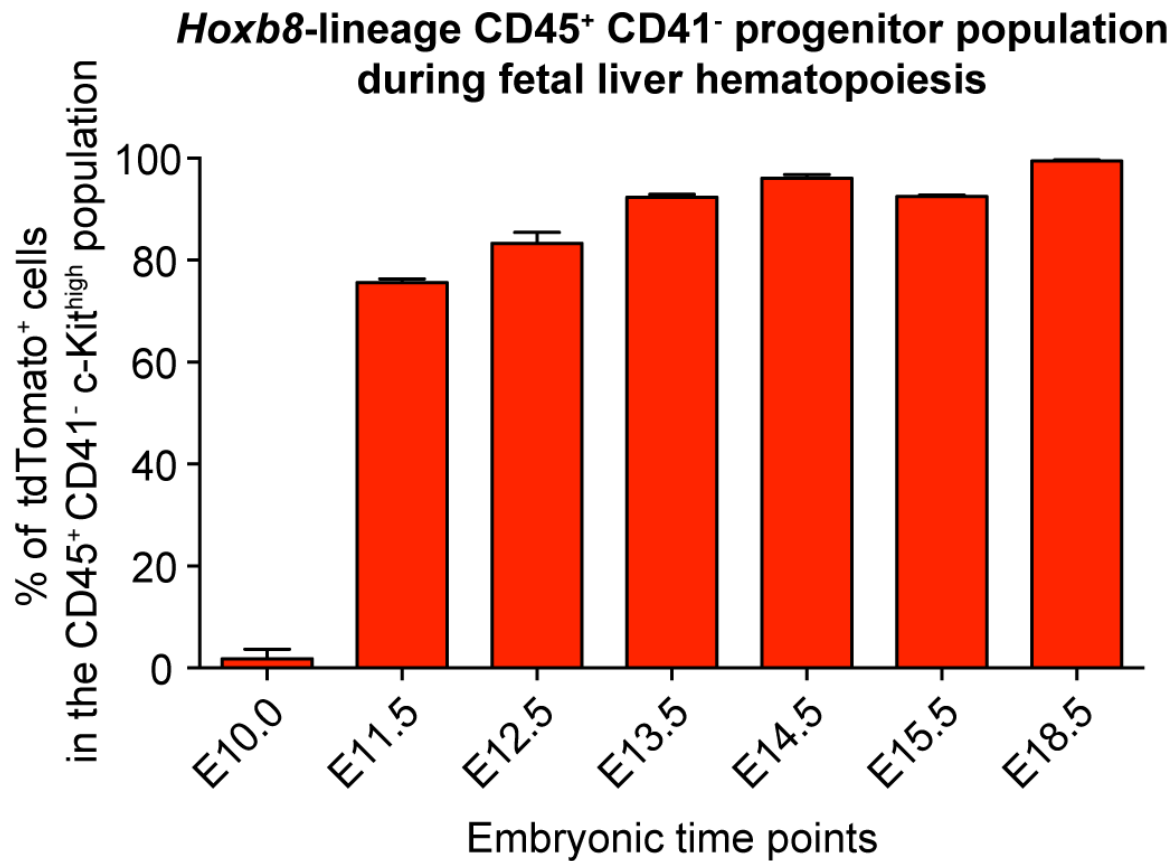

**Figure S1. *Hoxb8*-lineage progenitors in fetal liver hematopoiesis.** Related to Figure 3. Graph showing percentage of CD45<sup>+</sup> CD41<sup>-</sup> c-Kit<sup>high</sup> tdTomato<sup>+</sup> cells isolated from fetal liver through embryonic development. n=3 biological replicates per time point, bars represent the mean  $\pm$  SEM.

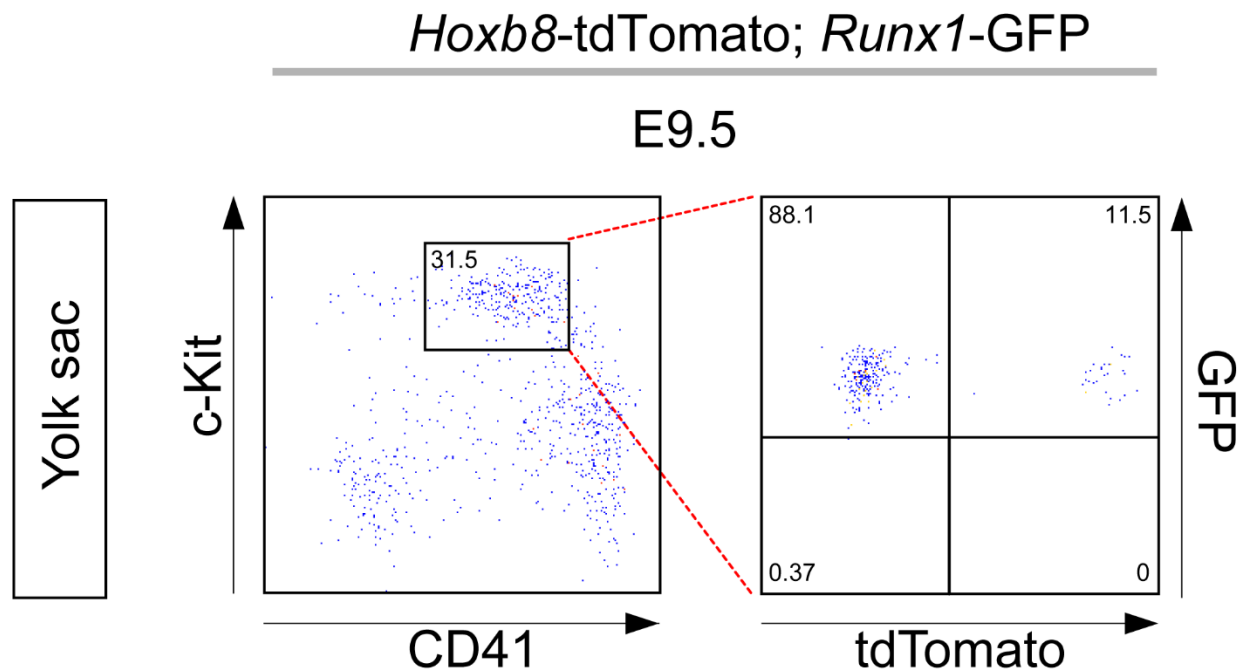

**Figure S2.** *Hoxb8*-lineage progenitors comprises of ~9% of the *Runx1* cell population in the yolk sac. Related to Figure 3. FACS profile of CD41<sup>+</sup> c-Kit<sup>high</sup> cells gated for GFP and tdTomato from the yolk sac of E9.5 *Runx1*<sup>GFP/+</sup>; *Hoxb8*<sup>IRES-Cre/+</sup>; *ROSA26*<sup>CAG-LSL-tdTomato/+</sup> embryos. n=3 pooled biological replicates.

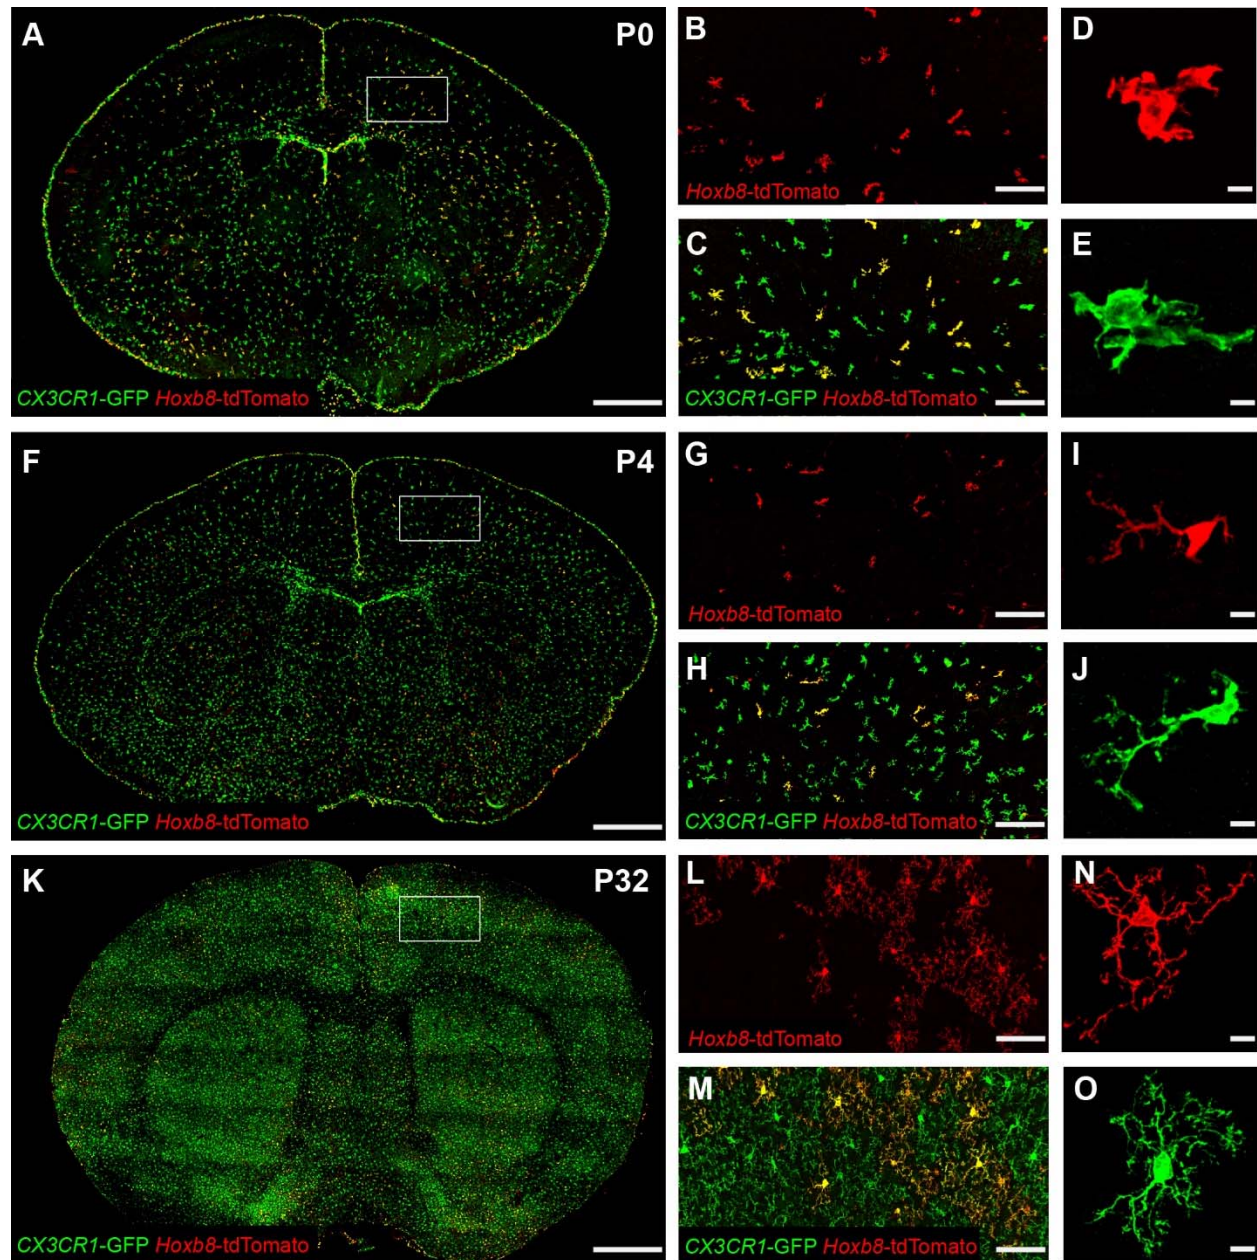

**Figure S3. Postnatal development of *Hoxb8*- and non-*Hoxb8*-microglia.** Related to Figure 2. Representative coronal sections from P0 (A, scale bar: 200  $\mu\text{m}$ ), P4 (F, scale bar: 300  $\mu\text{m}$ ) and P32 (K, scale bar: 500  $\mu\text{m}$ ) brains showing the increasing density (B-C, G-H, L-M, scale bars: 50  $\mu\text{m}$ ) and complexity of ramified processes (D-E, I-J, N-O, scale bars: 20  $\mu\text{m}$ ) at the respective time-points.

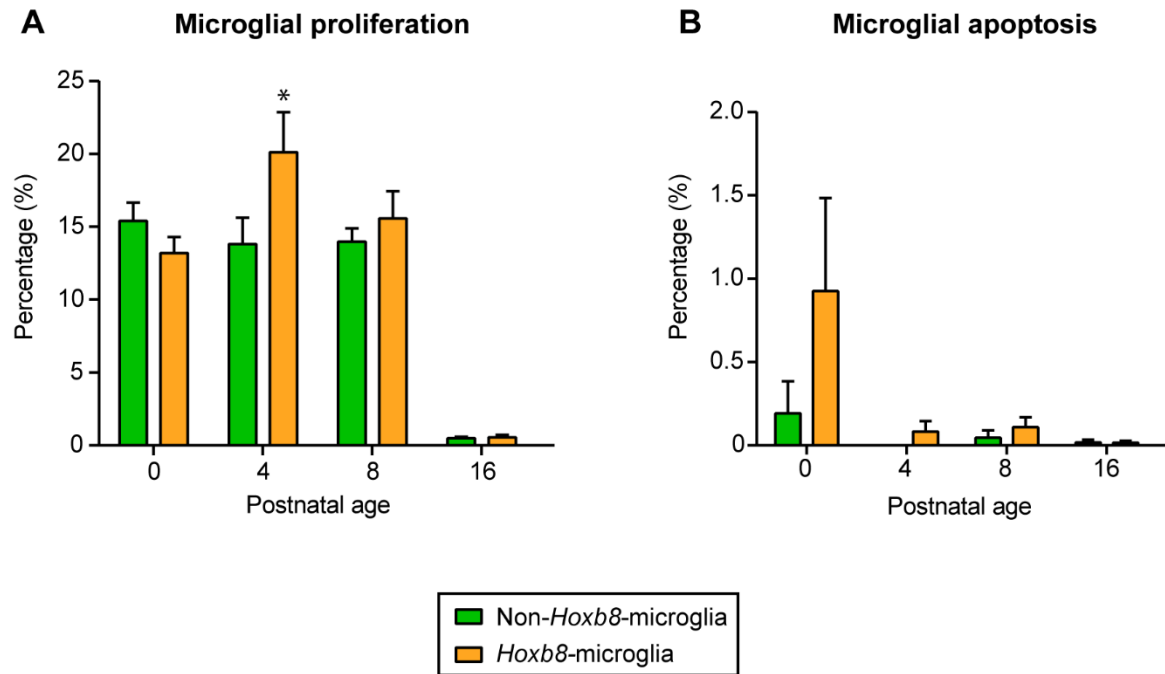

**Figure S4. Developmental dynamics of *Hoxb8*- and non-*Hoxb8*-microglia.** Related to Figure 2. (A,B) Comparison of proliferation (A) and apoptosis (B) between the two microglia populations during early postnatal development. The bars represent proliferating/apoptotic microglia as a percentage of their own specific population. n=3, \* p<0.05, bars represent the mean  $\pm$  SEM.

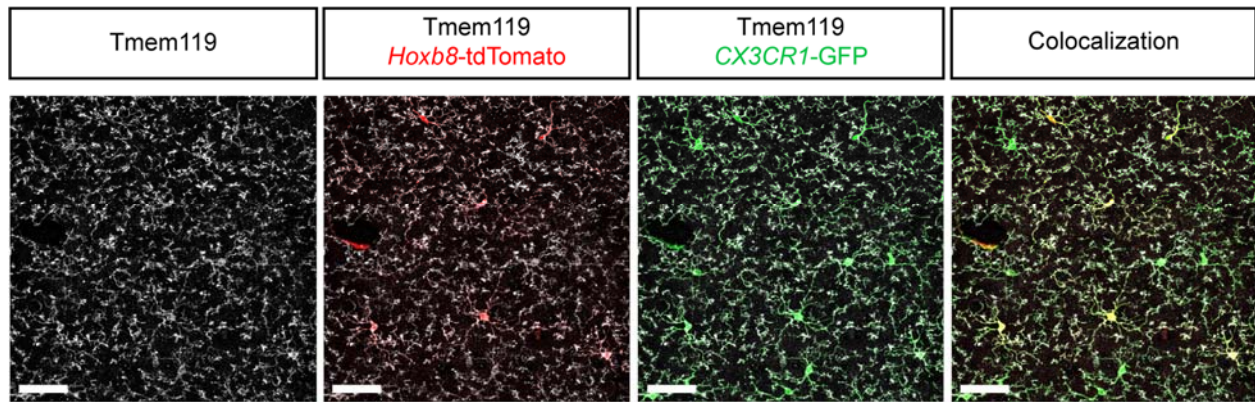

**Figure S5. Tmem119 expression.** Related to Table S2. Both *Hoxb8*- and non-*Hoxb8*-microglia show expression of the transmembrane protein 119 (Tmem119) on their ramified processes. Scale bars: 40  $\mu$ m.



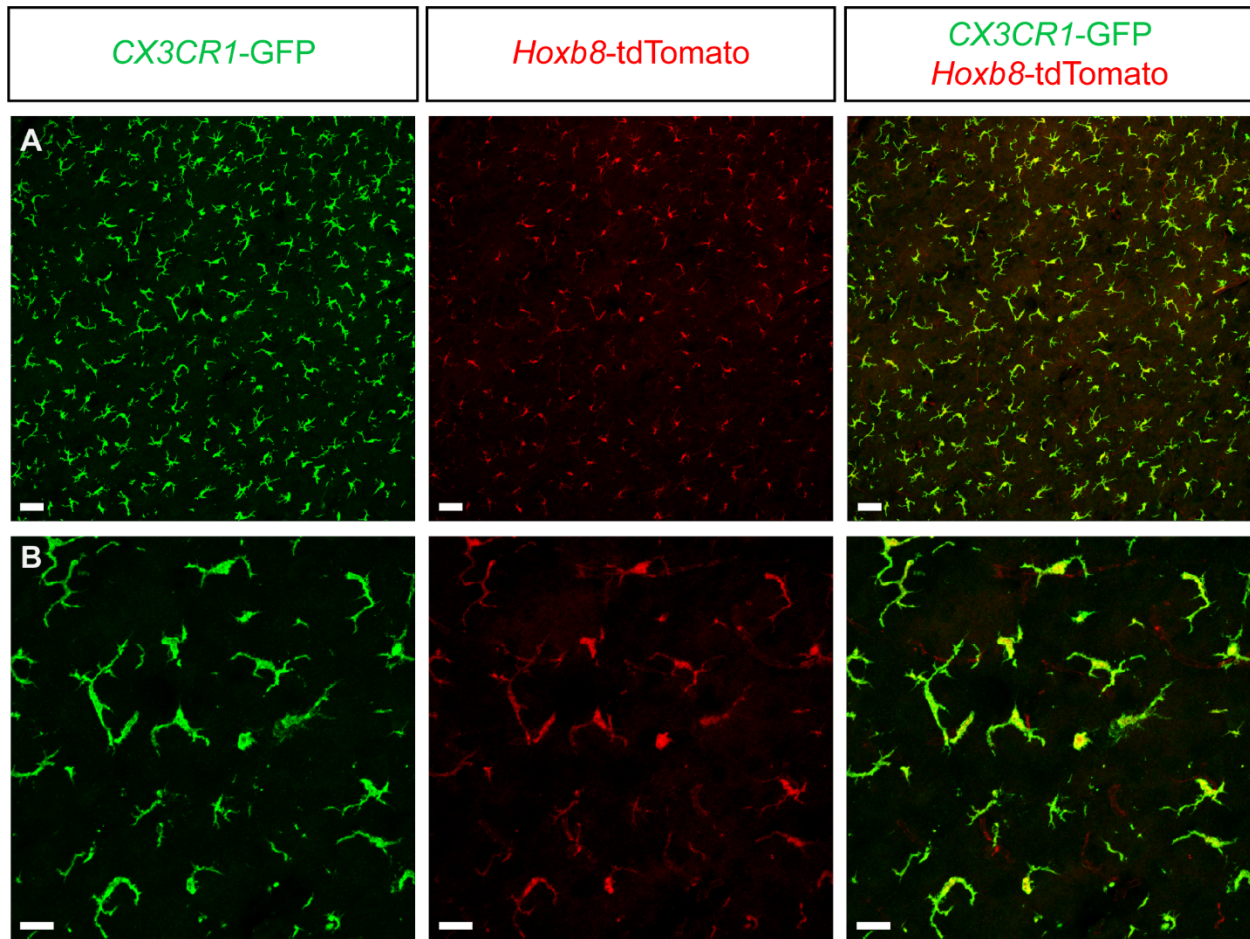

**Figure S6. E12.5 *Hoxb8*-lineage fetal liver hematopoietic progenitors differentiate and repopulate the brain parenchyma in *Csf1r* null mice.** Related to Figure 6. Note that although thousands of microglial cells have engrafted by P17, these cells have not fully matured. Scale bars: (A) 50  $\mu\text{m}$ , (B) 20  $\mu\text{m}$ .

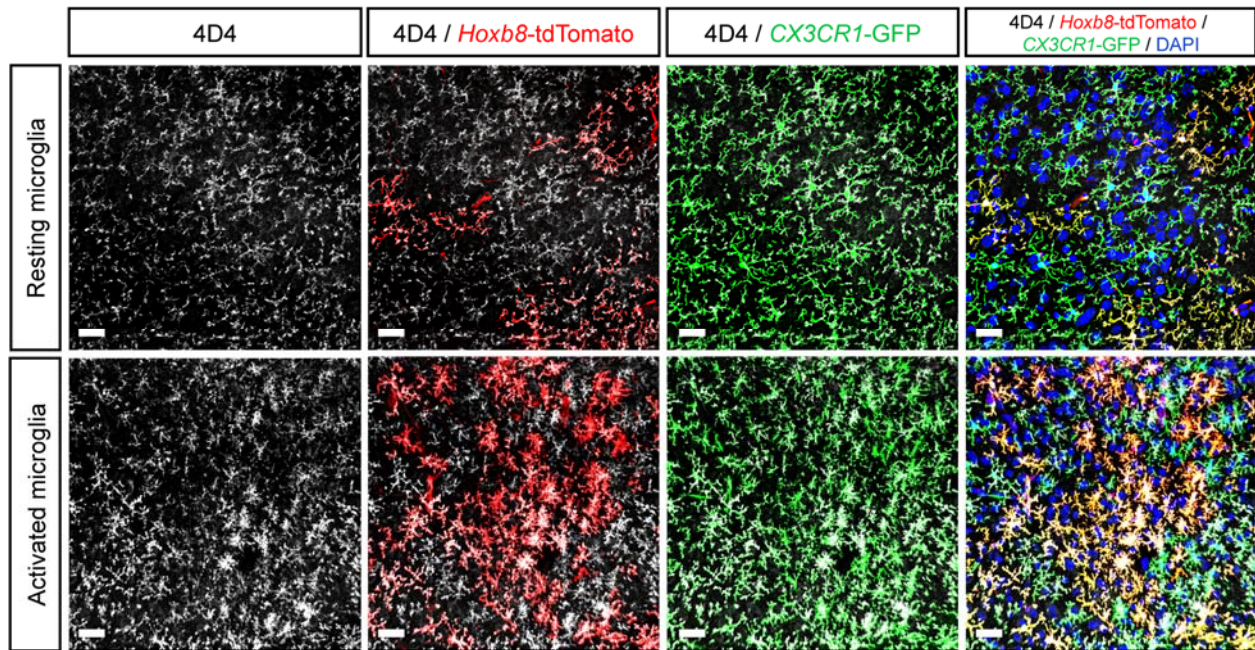

**Figure S7. Resident brain microglia are predominantly present at the site of injury.** Related to Figure 7. The 4D4 antibody allows the distinction of resident brain microglia from peripheral macrophages. Majority of the GFP<sup>+</sup> and GFP<sup>+</sup> tdTomato<sup>+</sup> cells around the site of injury are expressing 4D4 showing that they are resident brain microglia. Scale bars: 30  $\mu$ m.

**Table S1. Differentially expressed genes in *Hoxb8*-microglia compared to non-*Hoxb8*-microglia.** Related to Figure 5. RNASTAR analysis revealed 21 genes that were differentially expressed in *Hoxb8*-microglia.

| Ensembl #          | Fold Difference | p value | Common Gene Name |
|--------------------|-----------------|---------|------------------|
| ENSMUSG00000027009 | 4.580620809     | <0.0001 | Itga4            |
| ENSMUSG00000030214 | 4.246659468     | <0.0001 | Plbd1            |
| ENSMUSG00000034641 | 3.995970369     | <0.0001 | Cd300ld          |
| ENSMUSG00000047735 | 2.772480567     | 0.00122 | Samd9l           |
| ENSMUSG00000049037 | 2.954023796     | 0.00145 | Clec4a1          |
| ENSMUSG00000070354 | -2.505748451    | 0.00396 | Gm21975          |
| ENSMUSG00000049103 | 2.306712444     | 0.00754 | Ccr2             |
| ENSMUSG00000073421 | 2.712053997     | 0.00754 | H2-Ab1           |
| ENSMUSG00000026715 | 2.607464549     | 0.00868 | Serpinc1         |
| ENSMUSG00000026832 | 2.744409633     | 0.00868 | Cytip            |
| ENSMUSG00000021886 | 2.555949808     | 0.01377 | Gpr65            |
| ENSMUSG00000040711 | 2.607410017     | 0.01377 | Sh3pxd2b         |
| ENSMUSG00000104052 | -2.622239415    | 0.01377 | Gm38125          |
| ENSMUSG00000105472 | -2.59562299     | 0.01586 | RP23-200E11.1    |
| ENSMUSG00000064138 | -1.62989463     | 0.01688 | Fam172a          |
| ENSMUSG00000051906 | 2.230894994     | 0.04398 | Cd209f           |
| ENSMUSG00000009687 | 2.382666625     | 0.05744 | Fxyd5            |
| ENSMUSG00000053063 | 2.122713235     | 0.07959 | Clec12a          |
| ENSMUSG00000022550 | -2.284415883    | 0.09254 | Adck5            |
| ENSMUSG00000025150 | 2.291474247     | 0.09957 | Cbr2             |
| ENSMUSG00000037849 | 2.259747087     | 0.09957 | Gm4955           |

**Table S2. Gene expression profiles of *Hoxb8*- and non-*Hoxb8*-microglia.** Related to Figure 5.

[Click here to Download Table S2](#)



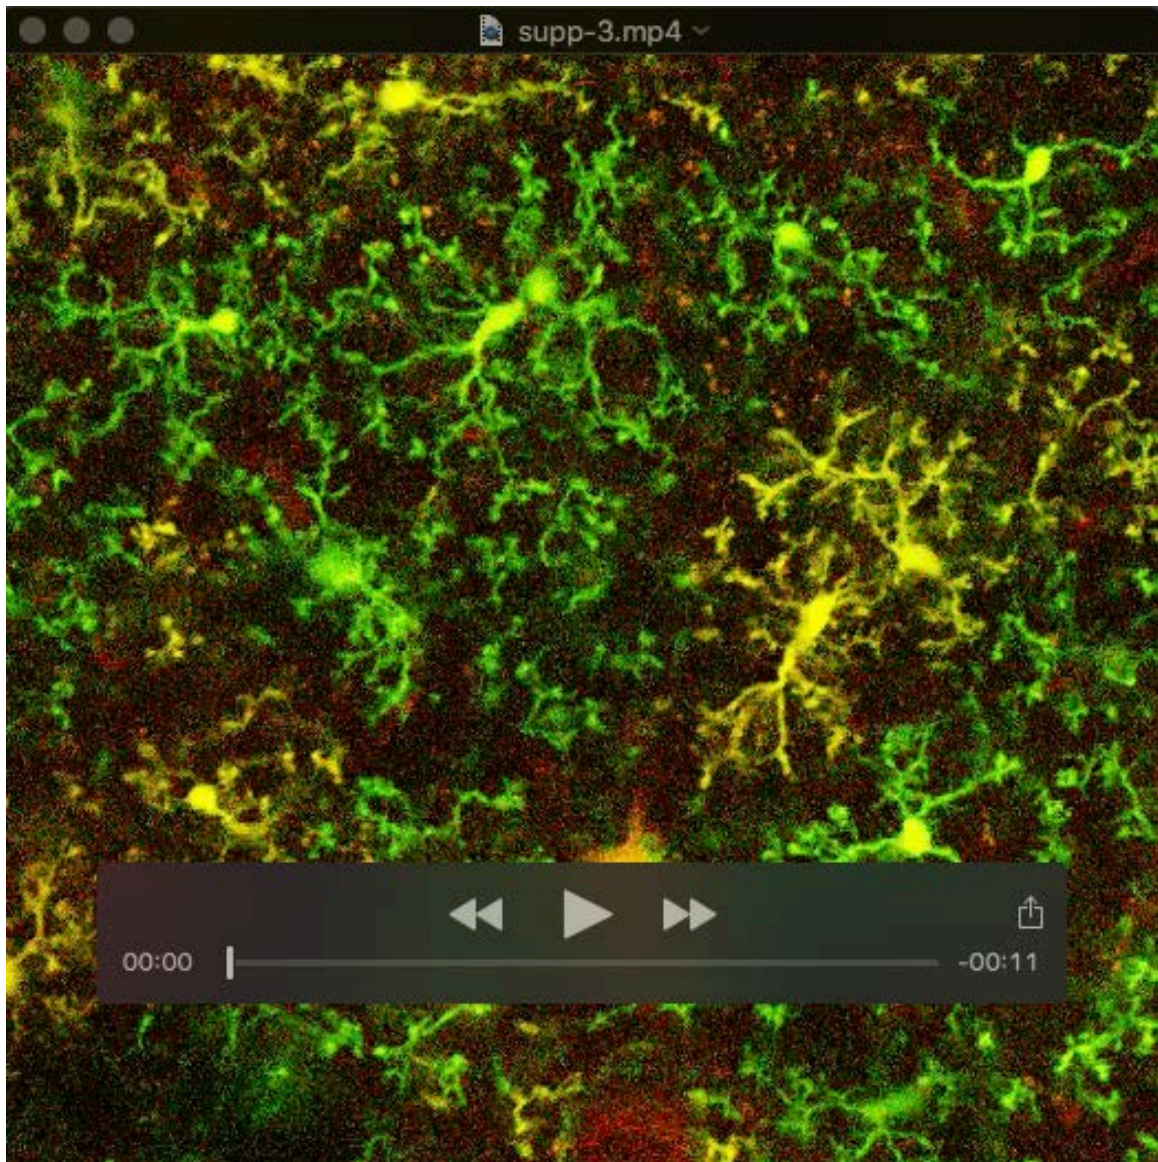

**Movie S1. Microglial activation response to focal laser ablation.** Related to Figure 7. Time-lapse recording of microglial response to damage induced by focused laser ablation in brain cortex, observed by *in vivo* multiphoton imaging. *Hoxb8*-microglia (yellow) and non-*Hoxb8*-microglia (green) exhibit very similar behavior in the event of an injury in their surrounding environment.
